# Supplementary material
Source: PubMed Central journal article supplement (PMC2810196)
Supplement: NIHMS167161-supplement-SI.pdf [file NIHMS167161-supplement-SI.pdf]

SUPPLEMENTARY INFORMATION

**TROSY-selected ZZ-exchange experiment for characterizing slow chemical exchange in large proteins**

Ying Li and Arthur G. Palmer, III

*Department of Biochemistry and Molecular Biophysics, Columbia University, New York, NY 10032*

**Derivation of eq. 1 in the main text**

In the absence of S<sup>3</sup>CT element, evolution of magnetization during the mixing period is given by

$$\frac{dM(t)}{dt} = -RM(t) \quad (S1)$$

$$M(t) = \begin{bmatrix} I_z(t) \\ 2I_z S_z(t) \\ S_z(t) \end{bmatrix} \quad (S2)$$

$$R = \begin{bmatrix} R_{1H} & \eta_H & \sigma \\ \eta_H & R_{1HN} & \eta \\ \sigma & \eta & R_{1N} \end{bmatrix} \quad (S3)$$

in which  $R_{1H}$  is the <sup>1</sup>H longitudinal relaxation rate,  $\sigma$  is the <sup>1</sup>H-<sup>15</sup>N heteronuclear cross relaxation rate,  $R_{1N}$  is the relaxation rate of <sup>15</sup>N longitudinal magnetization,  $R_{1N}$  is the relaxation rate of <sup>15</sup>N longitudinal two-spin order,  $\eta_z$  is the longitudinal <sup>15</sup>N-<sup>1</sup>H dipole/<sup>15</sup>N CSA cross-correlated relaxation rate,  $\eta_H$  is the longitudinal <sup>15</sup>N-<sup>1</sup>H dipole/<sup>1</sup>H CSA cross-correlated relaxation rate. Equilibrium magnetizations are cancelled by the phase cycle and are not included in the equations. The solution to eqs. (S1-S3) is  $M(t) = \exp(-Rt)M(0)$ .

With the S<sup>3</sup>CT element present in the middle of the mixing period, the evolution of magnetization is given by

$$\begin{aligned} M(t) &= \exp(-Rt/2)U \exp(-Rt/2)M(0) \\ &= \exp(-Rt/2)\exp(-URUt/2)UM(0) \\ &= [E - (R + URU)t/2 + \dots]UM(0) \\ &\approx \exp[-(R + URU)t/2]UM(0) \end{aligned} \quad (S4)$$

in which the transformation matrix  $U = \begin{bmatrix} 1 & 0 & 0 \\ 0 & 0 & 1 \\ 0 & 1 & 0 \end{bmatrix}$  represents the net effect of S<sup>3</sup>CT element.

Taking the derivatives of both left-hand side and right-hand side yields

$$\frac{dM(t)}{dt} \approx -\frac{R+URU}{2} \exp[-(R+URU)t/2]UM(0) \quad (S5)$$

Substituting eq. (S4) into eq. (S5) yields

$$\frac{dM(t)}{dt} \approx -\frac{R+URU}{2} M(t) = -R_{eff}M(t) \quad (S6)$$

To first order approximation, the effective rate matrix is

$$R_{eff} = \frac{R+URU}{2} = \begin{bmatrix} R_{1H} & \frac{\eta_H + \sigma}{2} & \frac{\eta_H + \sigma}{2} \\ \frac{\eta_H + \sigma}{2} & \bar{R}_1 & \eta_z \\ \frac{\eta_H + \sigma}{2} & \eta_z & \bar{R}_1 \end{bmatrix} \quad (S7)$$

in which  $\bar{R}_1 = (R_{1N} + R_{1HN})/2$ .

Transforming eq. (S6) from Cartesian to single-element basis set yields

$$\frac{dM'(t)}{dt} = -R'_{eff}M'(t) \quad (S8)$$

$$M'(t) = \begin{bmatrix} I_z(t) \\ S_z I^\alpha(t) \\ S_z I^\beta(t) \end{bmatrix} = U'M(t) \quad (S9)$$

$$R'_{eff} = U'R_{eff}U'^{-1} = \begin{bmatrix} R_{1H} & \eta_H + \sigma & 0 \\ \frac{\eta_H + \sigma}{2} & \bar{R}_1 + \eta_z & 0 \\ 0 & 0 & \bar{R}_1 - \eta_z \end{bmatrix} \quad (S10)$$

in which the transformation matrix  $U' = \frac{1}{2} \begin{bmatrix} 2 & 0 & 0 \\ 0 & 1 & 1 \\ 0 & -1 & 1 \end{bmatrix}$ . Combining eqs. (S8-S10) yields

$$\frac{d}{dt} \begin{bmatrix} I_z \\ S_z I^\alpha \\ S_z I^\beta \end{bmatrix} = - \begin{bmatrix} R_{1H} & \eta_H + \sigma & 0 \\ \frac{\eta_H + \sigma}{2} & \bar{R}_1 + \eta_z & 0 \\ 0 & 0 & \bar{R}_1 - \eta_z \end{bmatrix} \begin{bmatrix} I_z \\ S_z I^\alpha \\ S_z I^\beta \end{bmatrix} \quad (S11)$$

## Bruker pulse sequence for TROSY selected ZZ-exchange experiment

```
#include <Avance.incl>
#include <Delay.incl>
#include <UNBLKGRAD.incl>

define delay GRDELAY

.***** POWER LEVELS *****
;
; p1 = hard 1H pulse
; p3 = 15N hard pulse

.***** PULSES *****
;
; p1=1H 90
"p2=p1*2"
; p3=15N hard 90
"p4=p3*2"

; ***** RELAXATION DELAYS *****
;
; d1 = relaxation delay
; cnst20 = zz exchange delay in units of ms

"d17=(cnst20*1m)/2.0-GRDELAY-p26-3u"
"d18=(cnst20*1m)/2.0-GRDELAY-p27-3u"

; ***** PRESET DELAYS *****
;
"GRDELAY=200u"
"d20=2.68m"
"d21=2.5m"
"DELTA1=d21-p22-GRDELAY-3u"
"DELTA2=(d20/2.0)-p22-GRDELAY-3u"
"DELTA3=d20-p22-GRDELAY-3u"
"DELTA4=DELTA1-p9"
"DELTA5=d21-p25-GRDELAY-3u-3.0*p1-d19*2.5+p4/2"
"d4=(p3-p1)/2"
"d3=p4-p1"

;d19: delay for binomial water suppression
"d30=p1*2.385+2.5*d19-p4/2"

"d0=in0/2-p3*0.6369"
;in0=1/2SW1
;l0=number of complex points
;td1=2*I0
;MC2=States-TPPI
;ND0=2
```

"I0=td1/2"

ze  
20u pl3:f3  
1 30m  
30m\*3  
2 30m  
30m  
3 30m  
20u BLKGRAD  
d1

.\*\*\*\*\* INEPT \*\*\*\*\*

,  
3u UNBLKGRAD  
p21:gp21  
GRDELAY pl8:f1  
(p8 ph3):f1  
10u pl1:f1  
(p1 ph4):f1  
3u  
p22:gp22  
GRDELAY  
DELTA1  
(d4 d4 p2 ph4):f1 (p4 ph5):f3  
3u  
DELTA1  
p22:gp22  
GRDELAY  
(p1 ph3):f1

;

.\*\*\*\*\* S3E element \*\*\*\*\*

,  
(p3 ph5):f3  
3u  
p22:gp22  
GRDELAY  
DELTA2  
(d3 p2 ph1):f1 (p3 ph5 p4 ph25 p3 ph5):f3  
3u  
DELTA2  
p22:gp22  
GRDELAY  
(p3 ph6):f3  
3u  
p23:gp23  
GRDELAY BLKGRAD

```

(p3 ph26):f3
;

.***** t1 LABELING *****
,
d0
d0
;

.***** T/2 zz exchange *****
,
(p3 ph14):f3 ;Quadrature detection
3u UNBLKGRAD
p26:gp26
GRDELAY BLKGRAD
d17
;

.***** S3CT inversion *****
,
(p3 ph4):f3
3u UNBLKGRAD
p22:gp22
GRDELAY
DELTA3
(d4 d4 p2 ph4):f1 (p4 ph4):f3
3u
DELTA3
p22:gp22
GRDELAY BLKGRAD
(p2 ph4):f1 (p3 ph13):f3

.***** T/2 zz exchange *****
,
3u
p27:gp27
GRDELAY
d18
.***** TROSY period *****

(p1 ph7):f1 (p3 ph15):f3
10u pl9:f1
(p9 ph17):f1
13u UNBLKGRAD
p22:gp22
GRDELAY pl1:f1
DELTA4
(d4 d4 p2 ph4):f1 (p4 ph4):f3
3u

```

DELTA4  
p22:gp22  
GRDELAY pl9:f1  
(p9 ph4):f1  
10u pl1:f1  
(p1 ph4):f1  
(p3 ph1):f3

; WATERGATE with 3-9-19 pulse

3u  
p25:gp25  
GRDELAY  
DELTA5  
(p1\*0.231 ph10 d19 p1\*0.692 ph10 d19 p1\*1.462 ph10 d19):f1 (d30 p4 ph4):f3  
(p1\*1.462 ph11 d19 p1\*0.692 ph11 d19 p1\*0.231 ph11):f1  
DELTA5  
p25:gp25  
GRDELAY  
(p3 ph8):f3  
3u BLKGRAD

; \*\*\*\*\* ACQUISITION \*\*\*\*\*

go=1 ph0  
30m wr #0 if #0 dp14 zd  
lo to 2 times 2  
30m ip0\*2  
30m id0  
lo to 3 times l0  
exit

ph0=0 2 1 3 0 2 3 1  
2 0 3 1 2 0 1 3

ph1=1  
ph2=2  
ph3=3  
ph4=0

ph5=0 2 3 1  
ph25=1 3 0 2  
ph6=(8) 3 7 1 5 3 7 1 5  
7 3 5 1 7 3 5 1  
ph26=0 2 3 1  
ph7=1 1 1 1 3 3 3 3  
ph17=3 3 3 3 1 1 1 1  
ph8=0 0 0 0 2 2 2 2

ph10=1  
ph11=3  
ph13=3  
ph14=0 2 1 3  
ph15=2 0 3 1

## Example Bruker acquisition file (acqu) for TROSY-selected ZZ-exchange experiment

```
##TITLE= Parameter file, XWIN-NMR          Version 3.5
##JCAMPDX= 5.0
##DATATYPE= Parameter Values
##ORIGIN= UXNMR, Bruker Analytische Messtechnik GmbH
##OWNER=
$$
$$
##$AMP= (0..31)
100 100 100 100 100 100 100 100 100 100 100 100 100 100 100 100 100 100 100
100 100 100 100 100 100 100 100 100 100 100 100 100 100 100
##$AQSEQ= 0
##$AQ_mod= 3
##$AUNM= <au_zg>
##$AUTOPOS= <>
##$BF1= 600.13
##$BF2= 600.13
##$BF3= 60.810645
##$BF4= 600.13
##$BF5= 600.13
##$BF6= 600.12
##$BF7= 600.12
##$BF8= 600.12
##$BYTORDA= 1
##$CFDGTYP= 2
##$CFRGTY= 5
##$CHEMSTR= <none>
##$CNST= (0..31)
1 1 145 1 1 1 1 1 1 1 1 1 1 1 10 8 12 1 -40 400 20 1 1 1 1 10 30 50
25.33 1 1
##$CPDPRG= <>
##$CPDPRG1= <>
##$CPDPRG2= <garp>
##$CPDPRG3= <garp>
##$CPDPRG4= <mlev>
##$CPDPRG5= <mlev>
##$CPDPRG6= <mlev>
##$CPDPRG7= <mlev>
##$CPDPRG8= <mlev>
##$CPDPRGB= <>
##$CPDPRGT= <>
##$D= (0..31)
7.709842e-05 1.3 0.0027 7.55e-05 1.65e-05 0 0 0.001166 3e-06 0 5.75e-05
0.0002 0.0019115 4e-06 0 0 0 0.198997 0.199497 0.000231 0.00268 0.0025
0 0 0 0 0.0027 0 0 1.5 0.0005576575 0
```



```
##$DATE= 1248041096
##$DBL= (0..7)
120 120 120 120 120 120 120
##$DBP= (0..7)
150 150 150 150 150 150 150
##$DBP07= 0
##$DBPNAM0= <>
##$DBPNAM1= <>
##$DBPNAM2= <>
##$DBPNAM3= <>
##$DBPNAM4= <>
##$DBPNAM5= <>
##$DBPNAM6= <>
##$DBPNAM7= <>
##$DBPOAL= (0..7)
0.5 0.5 0.5 0.5 0.5 0.5 0.5
##$DBPOFFS= (0..7)
0 0 0 0 0 0 0
##$DE= 6
##$DECBNUC= <off>
##$DECIM= 16
##$DECNUC= <off>
##$DECSTAT= 4
##$DIGMOD= 1
##$DIGTYP= 8
##$DL= (0..7)
0 120 120 120 120 120 120
##$DP= (0..7)
150 150 150 150 150 150 150
##$DP07= 0
##$DPNAME0= <>
##$DPNAME1= <>
##$DPNAME2= <>
##$DPNAME3= <>
##$DPNAME4= <>
##$DPNAME5= <>
##$DPNAME6= <>
##$DPNAME7= <>
##$DPOAL= (0..7)
0.5 0.5 0.5 0.5 0.5 0.5 0.5
##$DPOFFS= (0..7)
0 0 0 0 0 0 0
##$DQDMODE= 0
##$DR= 18
##$DS= 128
##$DSLIT= <SSSSSSSSSSSSSSSSSS>
```

##\$DSPFIRM= 0  
##\$DSPFVS= 12  
##\$DTYPA= 0  
##\$EXP= <>  
##\$F1LIST= <1111111111111111>  
##\$F2LIST= <2222222222222222>  
##\$F3LIST= <3333333333333333>  
##\$FCUCHAN= (0..9)  
0 1 0 4 0 0 0 0 0  
##\$FL1= 90  
##\$FL2= 90  
##\$FL3= 90  
##\$FL4= 90  
##\$FOV= 20  
##\$FQ1LIST= <freqlist>  
##\$FQ2LIST= <freqlist>  
##\$FQ3LIST= <freqlist>  
##\$FQ4LIST= <freqlist>  
##\$FQ5LIST= <freqlist>  
##\$FQ6LIST= <freqlist>  
##\$FQ7LIST= <freqlist>  
##\$FQ8LIST= <freqlist>  
##\$FS= (0..7)  
83 83 83 83 83 83 83 83  
##\$FTLPGN= 0  
##\$FW= 125000  
##\$FnMODE= 0  
##\$GP031= 0  
##\$GPNAM0= <sine.100>  
##\$GPNAM1= <SINE.100>  
##\$GPNAM10= <sine.100>  
##\$GPNAM11= <sine.100>  
##\$GPNAM12= <sine.100>  
##\$GPNAM13= <sine.100>  
##\$GPNAM14= <sine.100>  
##\$GPNAM15= <sine.100>  
##\$GPNAM16= <sine.100>  
##\$GPNAM17= <sine.100>  
##\$GPNAM18= <sine.100>  
##\$GPNAM19= <sine.100>  
##\$GPNAM2= <SINE.100>  
##\$GPNAM20= <sine.100>  
##\$GPNAM21= <sine.100>  
##\$GPNAM22= <sine.100>  
##\$GPNAM23= <sine.100>  
##\$GPNAM24= <sine.100>



##\$LOCKFLD= 1531  
##\$LOCKGN= 133.100006103516  
##\$LOCKPOW= -20  
##\$LOCKPPM= 4.69999980926514  
##\$LOCNUC= <2H>  
##\$LOCPHAS= 355  
##\$LOCSHFT= no  
##\$LTIME= 0.200000002980232  
##\$MASR= 0  
##\$MASRLST= <masrlst>  
##\$NBL= 1  
##\$NC= -2  
##\$NS= 48  
##\$NUC1= <1H>  
##\$NUC2= <off>  
##\$NUC3= <15N>  
##\$NUC4= <off>  
##\$NUC5= <off>  
##\$NUC6= <off>  
##\$NUC7= <off>  
##\$NUC8= <off>  
##\$NUCLEI= 0  
##\$NUCLEUS= <off>  
##\$O1= 2809.55  
##\$O2= 0  
##\$O3= 7193.65823400153  
##\$O4= 0  
##\$O5= 0  
##\$O6= -99990000  
##\$O7= -99990000  
##\$O8= -99990000  
##\$OBSCHAN= (0..9)  
0 0 0 0 0 0 0 0 0  
##\$OVERFLW= 0  
##\$P= (0..31)  
10 9.5 19 42.5 85 1400 116 0 1600 1600 0 0 0 0 0 1500 500 1500 1000 1000  
500 1500 500 1500 0 1000 1000 500 2000 400 0 0  
##\$PAPS= 2  
##\$PARMODE= 1  
##\$PCPD= (0..9)  
100 250 200 200 100 100 100 100 100 100  
##\$PHCOR= (0..31)  
0 0 0 0 0 0 0 0 0 0 0 0 0 0 0 0 0 0 0 0 0 0 0 0 0 0 0 0 0 0 0 0  
##\$PHP= 1  
##\$PH\_ref= 0  
##\$PL= (0..31)

```
120 2 53 -0.5 120 13 120 120 44.5 47 120 120 120 120 120 120 13.55 120
120 120 120 120 120 120 120 120 120 120 120 120 120 120 120
##$POWMOD= 0
##$PR= 1
##$PRECHAN= (0..15)
-1 1 -1 -1 0 4 -1 -1 -1 -1 -1 -1 -1 -1 -1
##$PRGAIN= 0
##$PROBHD= <5 mm CPTXI 1H-13C/15N/2H Z-GRD Z44866/0137
>
##$PROSOL= no
##$PULPROG= <yl.ts.zzex_c.f3>
##$PW= 0
##$QNP= 1
##$QS= (0..7)83 83 83 83 83 83 83 22
##$QSB= (0..7)83 83 83 83 83 83 83 83
##$RD= 0
##$RECCHAN= (0..15)
-1 -1 -1 -1 -1 -1 -1 -1 -1 -1 -1 -1 -1 -1 -1
##$RECPH= 0
##$RG= 256
##$RO= 0
##$ROUTWD1= (0..23)
0 0 0 0 0 0 0 0 0 0 0 0 0 0 0 0 0 0 1 1 0 0
##$ROUTWD2= (0..23)
0 0 0 0 1 0 0 0 0 0 0 0 0 0 0 0 1 0 1 1 0 0
##$RPUUSED= (0..8)
0 0 0 0 0 0 0 0
##$RSEL= (0..9)
0 2 0 0 5 0 0 0 0 0
##$S= (0..7)
83 4 83 83 83 83 83 83
##$SEOUT= 0
##$SFO1= 600.13280955
##$SFO2= 600.13
##$SFO3= 60.817838658234
##$SFO4= 600.13
##$SFO5= 600.13
##$SFO6= 500.13
##$SFO7= 500.13
##$SFO8= 500.13
##$SOLVENT= <MeOD>
##$SP= (0..31)
1 17.4 0 0 0 0 17.4 0 40.4 40.4 0 0 0 0 0 0 150 150 150 150 150 150 150
150 150 150 150 150 150 150 150 150
##$SP07= 0
##$SPECTR= 0
```

```
##$SPNAM0= <gauss>
##$SPNAM1= <rsnob.512>
##$SPNAM10= <gauss>
##$SPNAM11= <gauss>
##$SPNAM12= <gauss>
##$SPNAM13= <gauss>
##$SPNAM14= <gauss>
##$SPNAM15= <gauss>
##$SPNAM16= <gauss>
##$SPNAM17= <gauss>
##$SPNAM18= <gauss>
##$SPNAM19= <gauss>
##$SPNAM2= <gauss>
##$SPNAM20= <gauss>
##$SPNAM21= <gauss>
##$SPNAM22= <gauss>
##$SPNAM23= <gauss>
##$SPNAM24= <gauss>
##$SPNAM25= <gauss>
##$SPNAM26= <gauss>
##$SPNAM27= <gauss>
##$SPNAM28= <gauss>
##$SPNAM29= <gauss>
##$SPNAM3= <gauss>
##$SPNAM30= <gauss>
##$SPNAM31= <gauss>
##$SPNAM4= <gauss>
##$SPNAM5= <gauss>
##$SPNAM6= <rsnob.512>
##$SPNAM7= <gauss>
##$SPNAM8= <square.1000>
##$SPNAM9= <square.1000>
##$SPOAL= (0..31)
0.5 0 0.5 0.5 0.5 0.5 0.5 0.5 0.5 0.5 0.5 0.5 0.5 0.5 0.5 0.5 0.5
0.5 0.5 0.5 0.5 0.5 0.5 0.5 0.5 0.5 0.5 0.5 0.5 0.5 0.5
##$SPOFFS= (0..31)
0 0 0 0 0 0 0 0 0 0 0 0 0 0 0 0 0 0 0 0 0 0 0 0 0 0 0 0 0 0 0
##$SUBNAM0= <"">
##$SUBNAM1= <"">
##$SUBNAM2= <"">
##$SUBNAM3= <"">
##$SUBNAM4= <"">
##$SUBNAM5= <"">
##$SUBNAM6= <"">
##$SUBNAM7= <"">
##$SUBNAM8= <"">
```

```
##$SUBNAM9= <"">
##$SW= 16.0220946001578
##$SWIBOX= (0..15)
0 0 4 4 0 5 6 0 0 0 0 0 0 0 0
##$SW_h= 9615.38461538462
##$TD= 2048
##$TD0= 1
##$TE= 309.6
##$TE2= 300
##$TE3= 300
##$TEG= 300
##$TL= (0..7)
0 120 120 120 120 120 120 120
##$TP= (0..7)
150 150 150 150 150 150 150 150
##$TP07= 0
##$TPNAME0= <>
##$TPNAME1= <>
##$TPNAME2= <>
##$TPNAME3= <>
##$TPNAME4= <>
##$TPNAME5= <>
##$TPNAME6= <>
##$TPNAME7= <>
##$TPOAL= (0..7)
0.5 0.5 0.5 0.5 0.5 0.5 0.5 0.5
##$TPOFFS= (0..7)
0 0 0 0 0 0 0 0
##$TUNHIN= 0
##$TUNHOUT= 0
##$TUNXOUT= 0
##$USERA1= <user>
##$USERA2= <user>
##$USERA3= <user>
##$USERA4= <user>
##$USERA5= <user>
##$V9= 5
##$VALIST= <valist>
##$VCLIST= <CCCCCCCCCCCCCCC>
##$VD= 0
##$VDLIST= <DDDDDDDDDDDDDDDD>
##$VPLIST= <PPPPPPPPPPPPPPP>
##$VTLIST= <TTTTTTTTTTTTTTTT>
##$WBST= 1024
##$WBSW= 2
##$WS= (0..7)83 83 83 83 83 83 83 83
```

```
##$XGAIN= (0..3)
0 0 0 0
##$XL= 0
##$YL= 0
##$YMAX_a= 23313
##$YMIN_a= -20015
##$ZGOPTNS= <>
##$ZL1= 120
##$ZL2= 120
##$ZL3= 120
##$ZL4= 120
##END=
```
